# Supplementary material for: The olfactory neuron AWC promotes avoidance of normally palatable food following chronic dietary restriction
Source: PubMed Central journal article supplement — J Exp Biol. 2014 May 15;217(10):1790–8. doi: 10.1242/jeb.099929 (PMC4020945; doi:10.1242/jeb.099929), 2014-05-15
Supplement: supp_217.10.1790_JEB099929.pdf [file supp_217.10.1790_JEB099929.pdf]

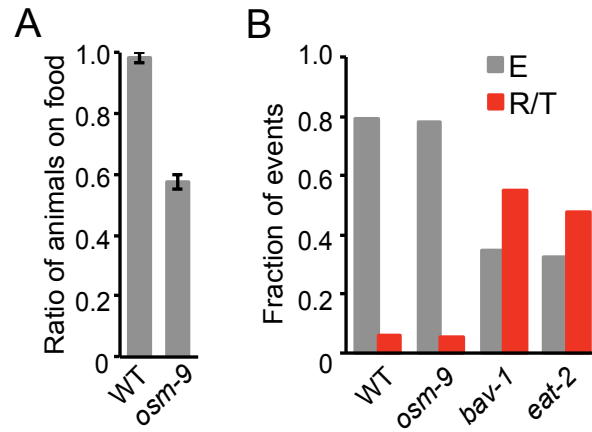

**Fig. S1.** (A) *osm-9* mutants distribute more off food than wild-type animals. (B) *osm-9* behave similar to wild-type when approaching food from the off food area. Events scored manually at 24 h: E, enter, i.e. the animals move directly onto food; R/T, reversals and turns.

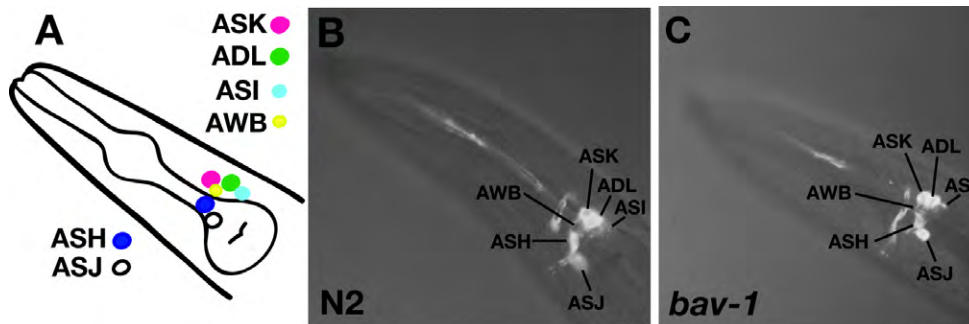

**Fig. S2.** Characterisation of *bav-1*. (A–C) Dye-filling. Schematic drawing indicating cell bodies of amphid neurons that dye fill (A). Dye filling of wild-type (B) and *bav-1* (C) animals shows no differences.

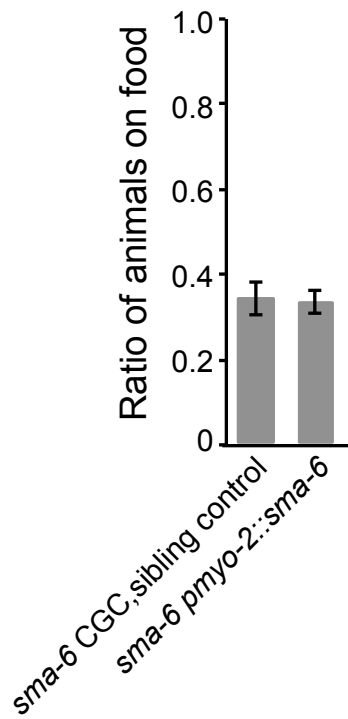

**Fig. S3.** Food-avoidance behavior of *sma-6* is not restored when *sma-6* is expressed with the pharyngeal promoter *myo-2*. Error bars represent s.e.m.

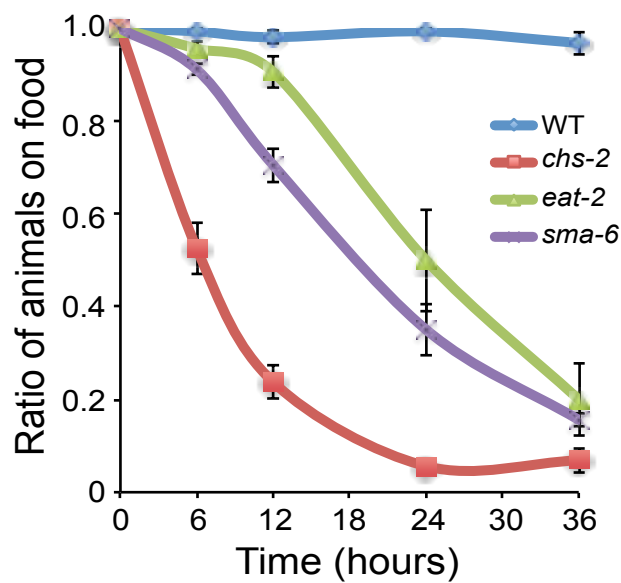

**Fig. S4.** Food-avoidance behaviour to HB101. *chs-2*, *eat-2* and *sma-6* mutant animals avoid the *E. coli* strain HB101 similarly to OP-50. Error bars represent s.e.m.

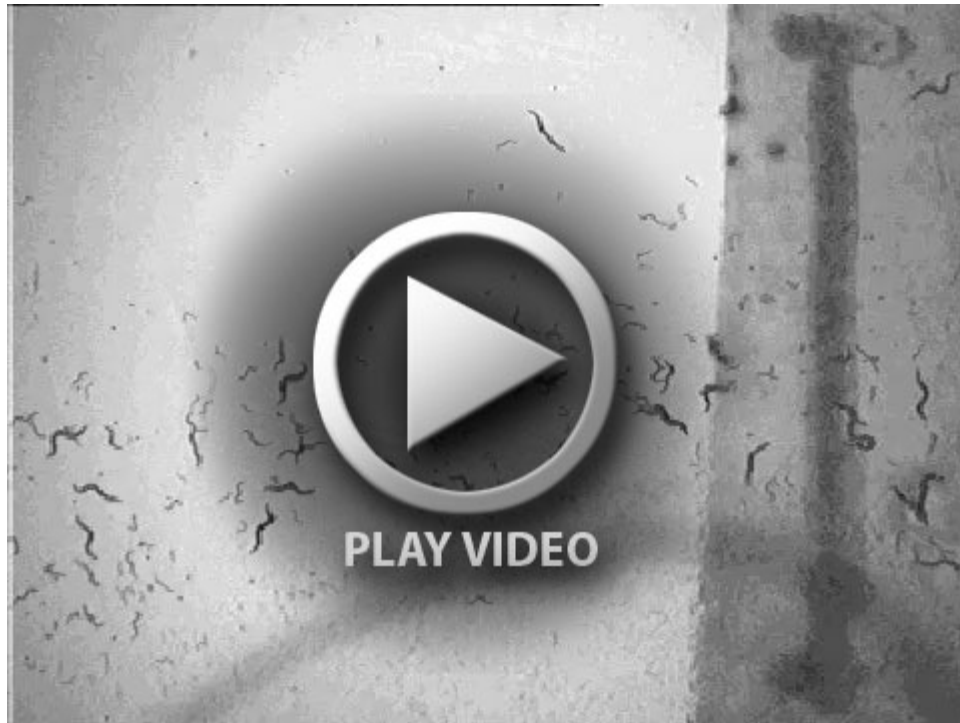

**Movie 1.** *bav-1* animals accumulate off food and show avoidance behavior towards food. Speed 10×. The food lawn is located in the bottom center.

**Table S1. *Caenorhabditis elegans* strains used**

Wild-type N2 CGC  
 DA465 *eat-2(ad465)*  
 GE337 (CGC)  
 BOL1 *chs-2(mbd1)* (=GE337 outcrossed 3x=*bav-1*)  
 DA472 *pha-2(ad472)*  
 DA601 *eat-6(ad601)*  
 BOL19 *eat-2(ad465);tax-4(p678)*  
 BOL82 *eat-2(ad465);osm-9(ky10)*  
 BOL80 *eat-2(ad465);odr-3(n2150)*  
 BOL160 *odr-1(ky225);eat-2(ad465)*  
 BOL89 *chs-2(mbd1) mbdEx[chs-2::chs-2 genomic]*  
 BOL114 *chs-2(mbd1);tax-4(p678)*  
 BOL162 *chs-2(mbd1);tax-2(p694)*  
 BOL173 *eat-2(ad465);tax-4(p678) mbdEx [pstr-3::tax-4, punc-122::gfp]*  
 BOL170 *eat-2(ad465); tax-4(p678) mbdEx [psrg-8::tax-4, punc-122::gfp]*  
 BOL98 *eat-2(ad465); tax-4(p678) mbdEx [pstr-1::tax-4, punc-122::gfp]*  
 BOL164 *eat-2(ad465); tax-4(p678) mbdEx [psra-13::tax-4, punc-122::gfp]*  
 BOL174 *eat-2(ad465); tax-4(p678) mbdEx [pgpa-10::tax-4, punc-122::mCherry]*  
 BOL172 *eat-2(ad465); tax-4(p678) mbdEx [psrg-8::tax-4,pstr-3::tax-4 punc-122::mCherry]*  
 BOL171 *eat-2(ad465); tax-4(p678) mbdEx [pstr-1::tax-4,pstr-3::tax-4, punc-122::gfp]*  
 BOL165 *eat-2(ad465); tax-4(p678) mbdEx [psrg-8::tax-4,pgpa-10::tax-4, punc-122::mCherry]*  
 BOL100 *eat-2(ad465); tax-4(p678) mbdEx [psrg-8::tax-4,pstr-3::tax-4, pgpa-10::tax-4, punc-122::gfp]*  
 BOL177 *eat-2(ad465); tax-4(p678) mbdEx [ptrx-1::tax-4, punc-122::gfp]*  
 BOL176 *eat-2(ad465); tax-4(p678) mbdEx [pstr-3::tax-4,ptrx-1::tax-4 punc-122::gfp]*  
 BOL167 *eat-2(ad465); tax-4(p678) mbdEx [ptrx-1::tax-4,psrbc-64::tax-4, punc-122::gfp]*  
 BOL168 *eat-2(ad465); tax-4(p678) mbdEx [ptrx-1::tax-4,psrbc-64::tax-4, pstr-3::tax-4, punc-122::gfp]*  
 VC 48 *kpc-1(gk8)*  
 CB502 *sma-2(e502)*  
 LT121 *dbl-1(wk70)*  
 VC547 *daf-4(ok828)*  
 DR1369 *sma-4(e729)*  
 LT186 *sma-6(wk7)*  
 VC1183 *sma-9(ok1628)*  
 BOL29 *aak-2(ok524);eat-2(ad465)*  
 BOL175 *chs-2(mbd); rsk-1(sv31)*  
 BOL74 *hen-1(tm501);eat-2(ad465)*  
 JC2154 *hen-1(tm501)*  
 BV633 *rsk-1(sv31)* a kind gift from Dr. S. Tuck  
 DA476 *daf-22(m130)*  
 ZC235 *dbl-1(nk3); yxEx172.7[pdbl-1::dbl-1; punc-122::gfp]*  
 ZC1524 *dbl-1(nk3); yxIs17[pflp-18::nCre; punc-122::rfp]; yxEx694[pnmr-1s::LoxPStopLoxP::dbl-1; pnmr-1s::LoxPStopLoxP::gfp; punc-122::gfp]*  
 ZC1334 *sma-6(wk7);yxEx615[psma-6::sma-6;punc-122::gfp]*  
 ZC1341 *sma-6(wk7);yxEx622[pstr-3::sma-6;punc-122::gfp]*  
 ZC1531 *sma-6(wk7);yxEx743[pcol-12::sma-6;punc-122::gfp]*  
 ZC1573 *sma-6(wk7);yxEx765[pges-1::sma-6;punc-122::gfp]*
